# Supplementary material
Source: HighWire-hosted journal article supplement (https://www.g3journal.org/content/suppl/2015/02/11/g3.114.015883)
Supplement: FigureS4.pdf [file FigureS4.pdf]

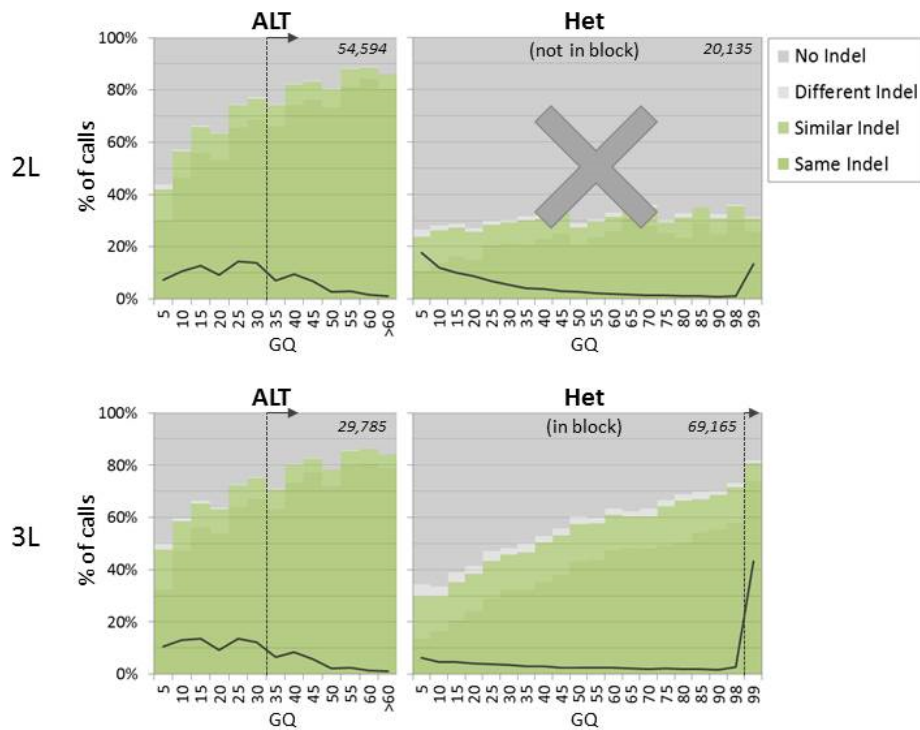

**Figure S4 Small Indel Validation Rate Correlates with Genotype Quality Score**

Validation rates were determined for different classes of GATK small indel calls, divided by chromosome (rows: 2L, 3L), small indel genotype (columns: ALT, Het), and Genotype Quality score (x-axes: GQ) for line ZW155 compared to the 100x validation dataset. Green bars indicate the genotypic agreement for each GQ bin; grey bars indicate discordant calls. The relative frequency of each GQ bin for each class of genotype call is shown as a dark grey line, with heterozygous calls having a bimodal GQ distribution. Vertical black lines and arrows indicate the GQ cutoff for each class of genotype call used to filter the small indel dataset. All heterozygous calls in regions of low heterozygous call frequency (assessed per line) were filtered out of the final small indel genotypes.
